# Supplementary material for: Mono-molecule-layer nano-ribbons formed by self-assembly of bolaamphiphiles
Source: Royal Society of Chemistry journal article supplement (doi:10.1039/c3sm52365a), 2013-11-16

## Supporting Information

### Mono-molecule-layer nano-ribbons formed by self-assembly of bolaamphiphiles

Jinlong Huang,<sup>a</sup> Shuai Wang,<sup>b</sup> Guanglu Wu,<sup>c</sup> Li Yan,<sup>b</sup> Lin Dong,<sup>a</sup> Xiaoping Lai,<sup>a</sup>  
Shouchun Yin,<sup>\*a</sup> and Bo Song<sup>\*b</sup>

<sup>a</sup>College of Material Chemistry and Chemical Engineering, Hangzhou Normal University, Hangzhou 310036, P. R. China. Fax: +86 (571)28867899; Tel: +86 (571)28867899; E-mail: yinsc@ustc.edu

<sup>b</sup>Jiangsu Key Laboratory of Advanced Functional Polymer Design and Application, Department of Polymer Science and Engineering, College of Chemistry, Chemical Engineering and Materials Science, Soochow University, Suzhou 215123, P. R. China. Fax: +86 (512) 65880583; Tel: +86 (512) 65882507; E-mail: songbo@suda.edu.cn

<sup>c</sup>Key Lab of Optoelectronics and Molecular Engineering, Department of Chemistry, Tsinghua University, Beijing 100084, P. R. China

#### Table of Contents

1. **Fig. S1.** <sup>1</sup>H NMR spectrum of **B**: pages S2.
2. **Fig. S2.** <sup>1</sup>H NMR spectrum of **C**: pages S2.
3. **Fig. S3.** <sup>1</sup>H NMR spectrum of **D**: pages S3.
4. **Fig. S4.** <sup>1</sup>H NMR spectrum of **E**: pages S3.
5. **Fig. S5.** <sup>1</sup>H NMR spectrum of PyTz-11-Ts: pages S4.
6. **Fig. S6.** ESI-MS spectra of PyTz-11-Ts: pages S4.
7. **Fig. S7.** NMR spectrum of PyTz-11-Ts in aqueous solution with concentration of  $1.0 \times 10^{-3}$  mol/L. Page S5.
8. **Fig. S8.** Intermittent contact AFM images of PyTz-11-Ts before (left) and after

(right) addition of 5  $\mu\text{L}$   $\text{CH}_3\text{CN}$  into 3 mL  $\text{H}_2\text{O}$ : pages S5.

**Fig. S1.**  $^1\text{H}$  NMR spectra of **B**.

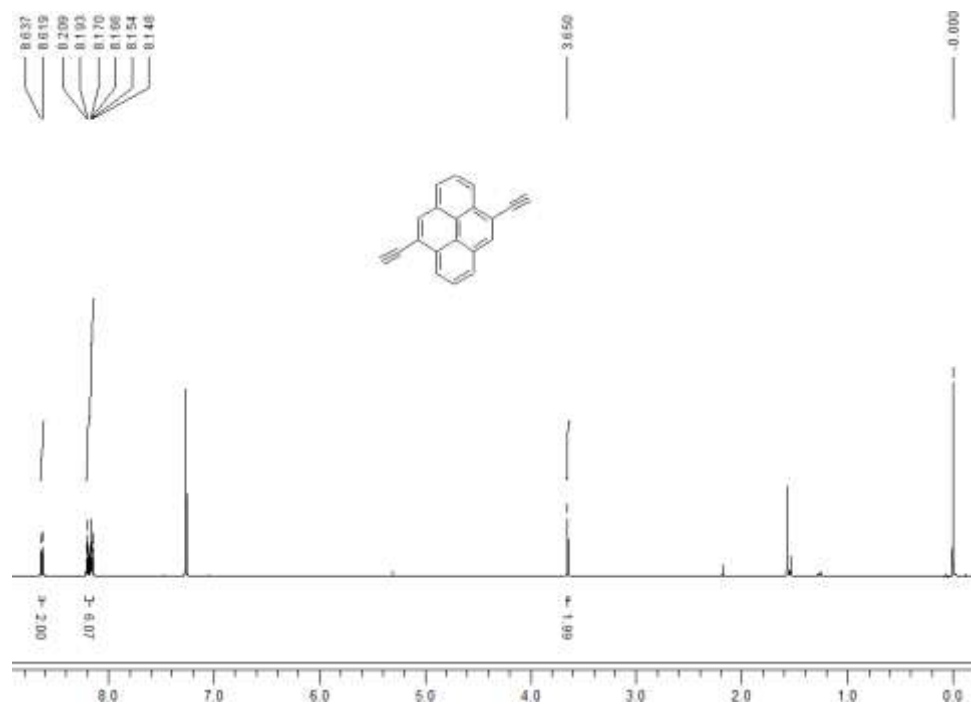

**Fig. S2.**  $^1\text{H}$  NMR spectra of **C**.

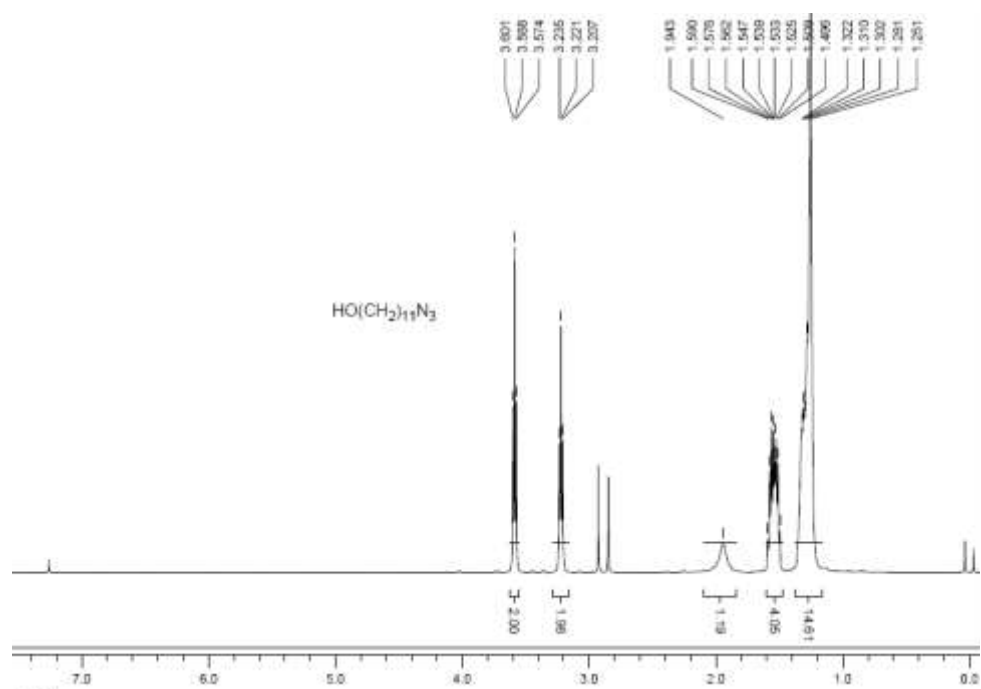

**Fig. S3.**  $^1\text{H}$  NMR spectra of **D**.

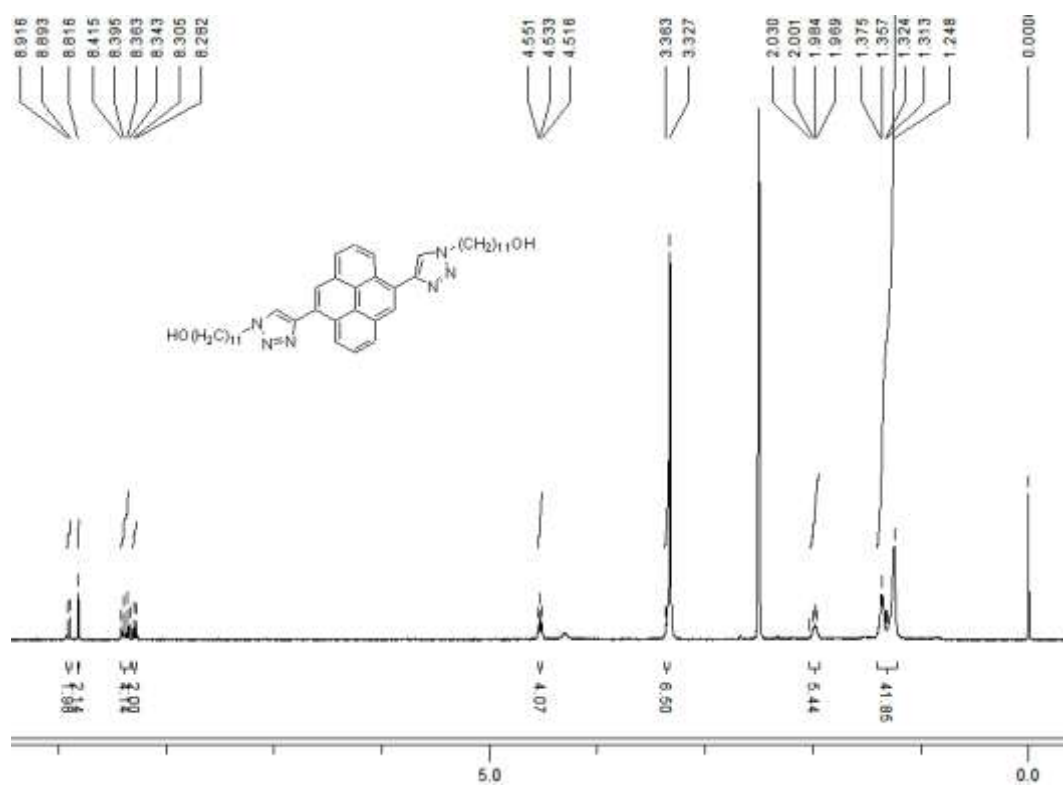

**Fig. S4.**  $^1\text{H}$  NMR spectra of **E**.

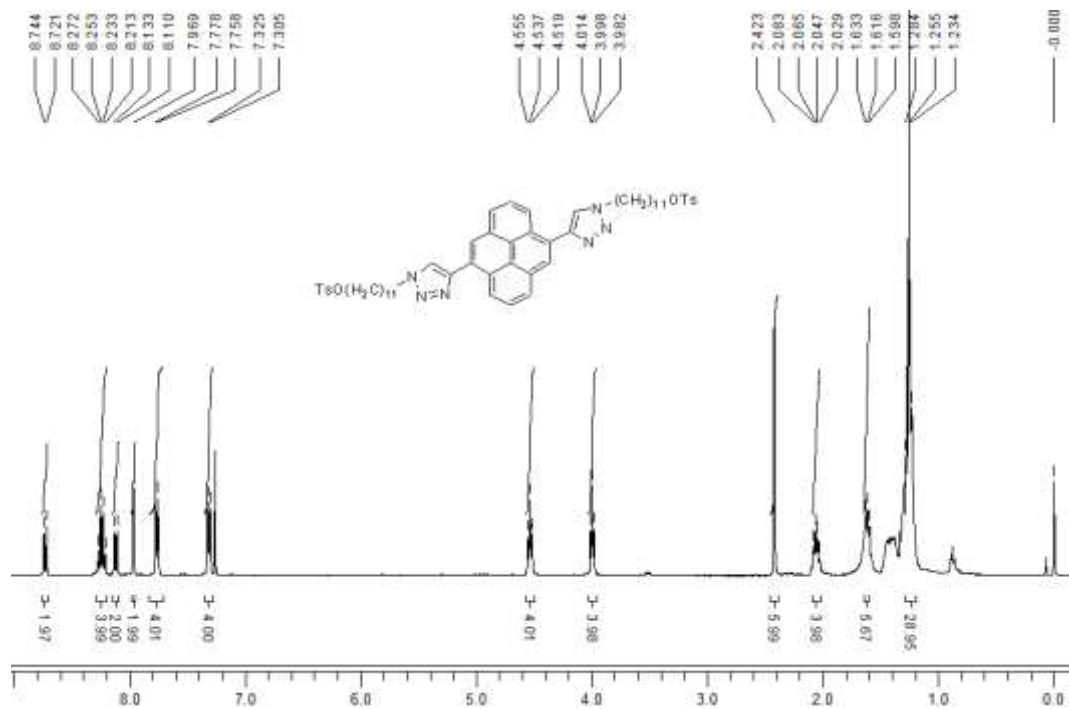

**Fig. S5.**  $^1\text{H}$ NMR spectra of PyTz-11-Ts.

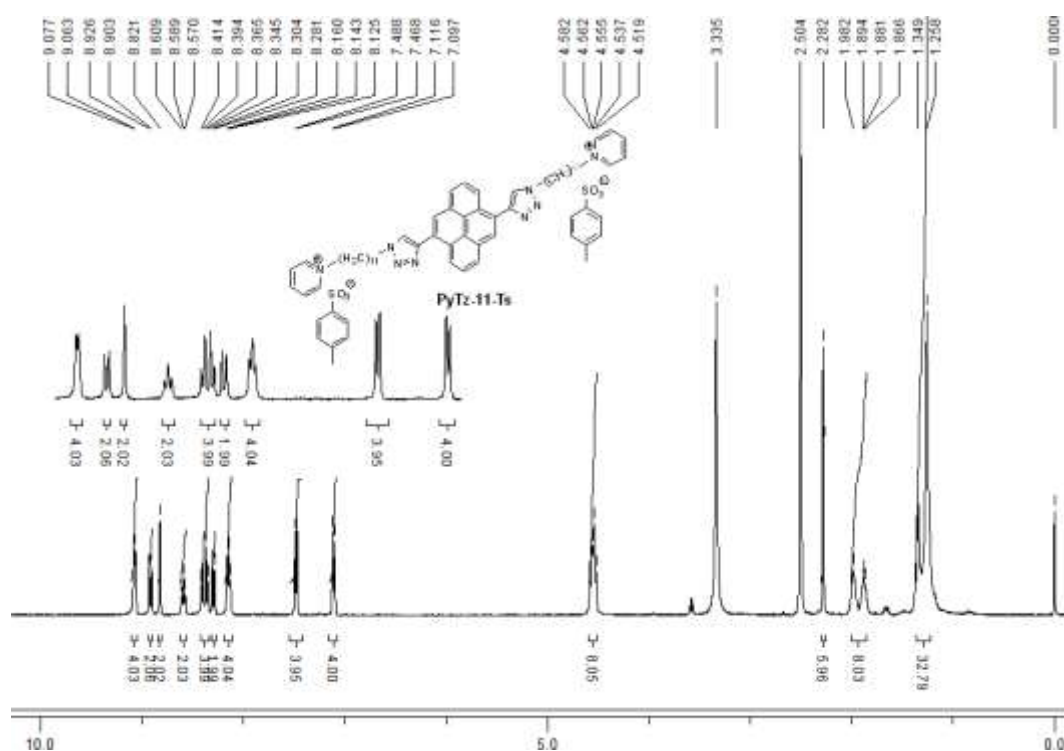

**Fig. S6.** ESI-MS spectra of PyTz-11-Ts.

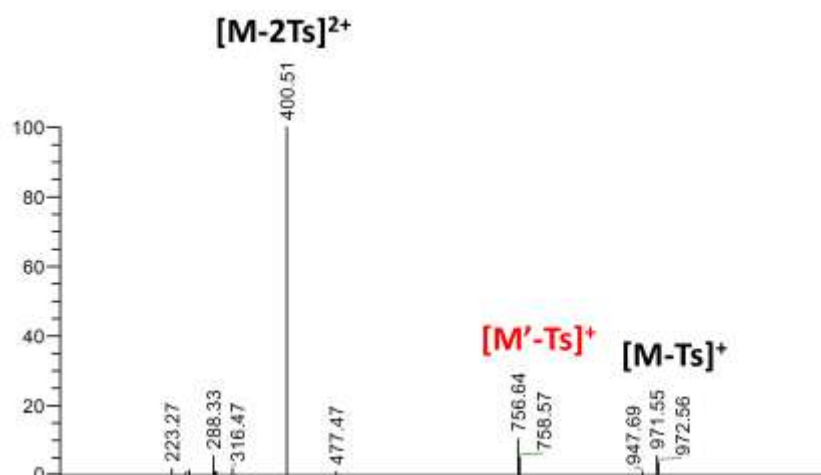

**Fig. S7.** NMR spectra of PyTz-11-Ts in aqueous solution with concentration of  $1.0 \times 10^{-3}$  mol/L. The peaks of pyridine are clear and strong, while the peaks of bistriazole-pyrene become relatively wide and weak, indicating the aggregation of the bolaamphiles.

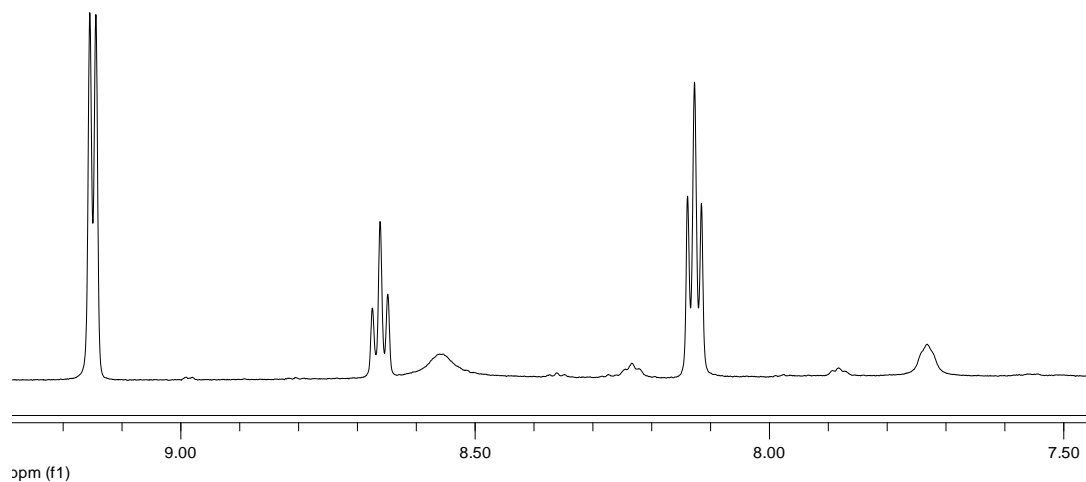

**Fig. S8.** Intermittent contact AFM images of PyTz-11-Ts after addition of 5  $\mu\text{L}$   $\text{CH}_3\text{CN}$  into 3 mL  $\text{H}_2\text{O}$ . The concentration of PyTz-11-Ts is  $5 \times 10^{-4}$  mol/L.

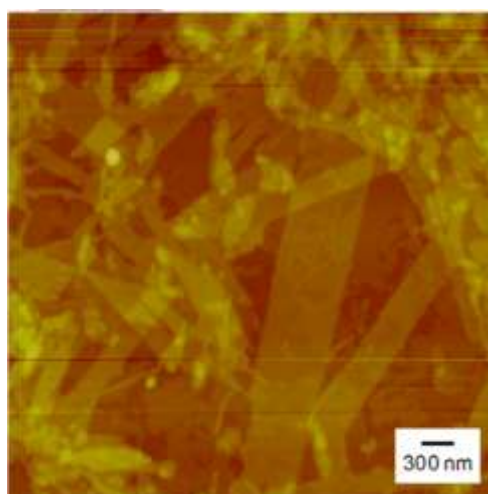

Supplement: c3sm52365a.pdf [file c3sm52365a.pdf]
